# Supplementary material for: Surface ligand engineering of perovskite nanocrystals with a conjugated sulfonate ligand for light-emitting applications
Source: Royal Society of Chemistry journal article supplement (doi:10.1039/d2ma00595f), 2022-01-01
Supplement: d2ma00595f1.pdf [file d2ma00595f1.pdf]

## Electronic Supporting Information (ESI)

### Surface Ligand Engineering of Perovskite Nanocrystals with a Conjugated Sulfonate Ligand for Light-Emitting Applications

Chen-Hsuan Kuan and Sheng-Hsiung Yang\*

*Institute of Lighting and Energy Photonics, College of Photonics, National Yang Ming Chiao Tung University, No.301, Section 2, Gaofa 3<sup>rd</sup> Road, Guiren District, Tainan 71150, Taiwan R.O.C.*

\*Correspondence: [yangsh@nycu.edu.tw](mailto:yangsh@nycu.edu.tw)

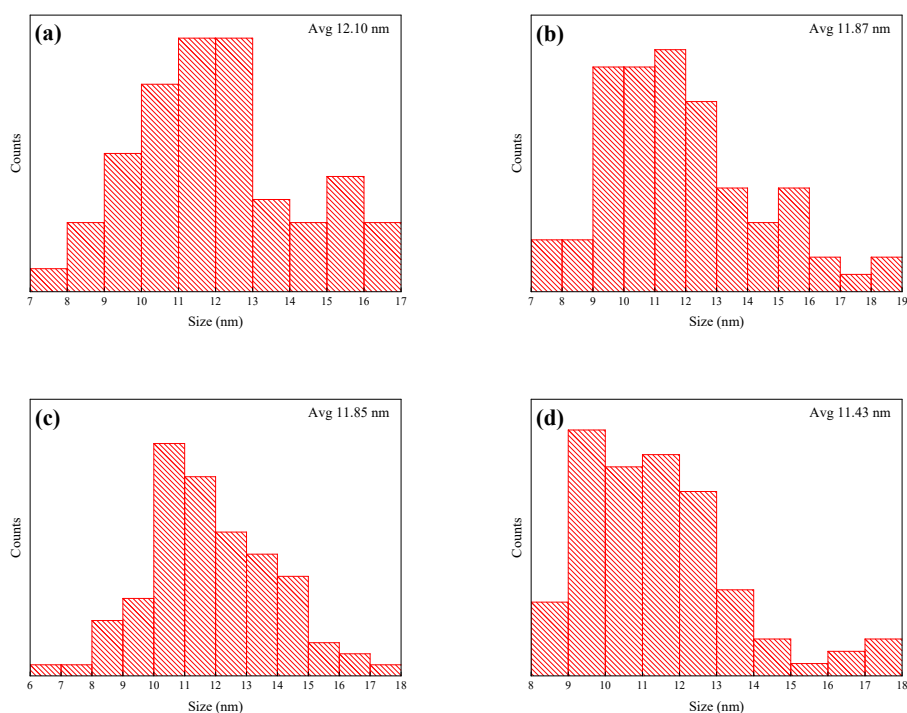

**Fig. S1.** Size distribution histograms of the pristine and SβSS-modified CsPbBr<sub>3</sub> NCs incorporating (a) 0, (b) 5, (c) 10, and (d) 20 mg of SβSS ligand.

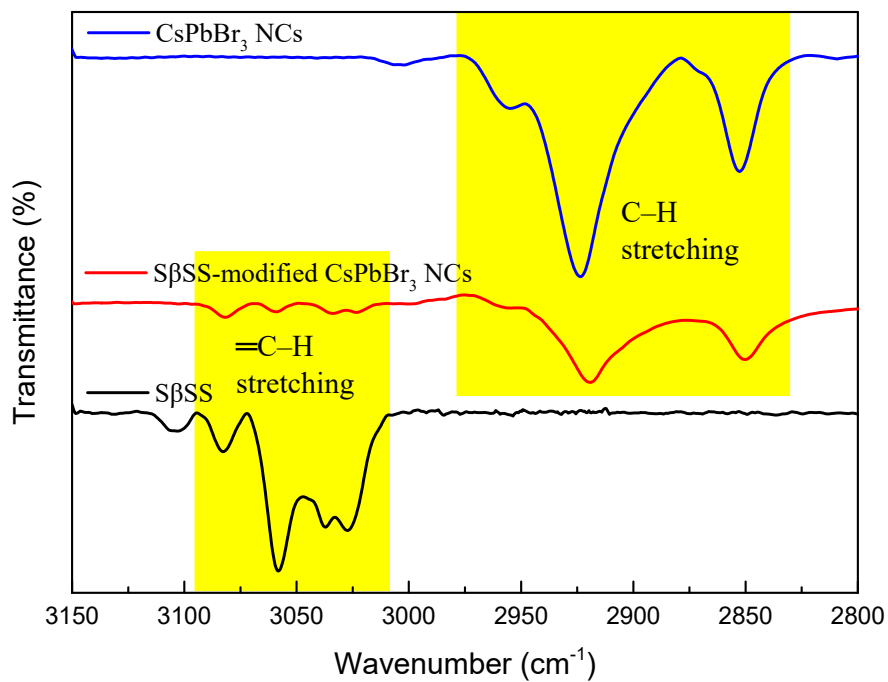

**Fig. S2.** FT-IR spectra corresponding to SβSS, the pristine and SβSS-modified CsPbBr<sub>3</sub> NCs (10 mg).

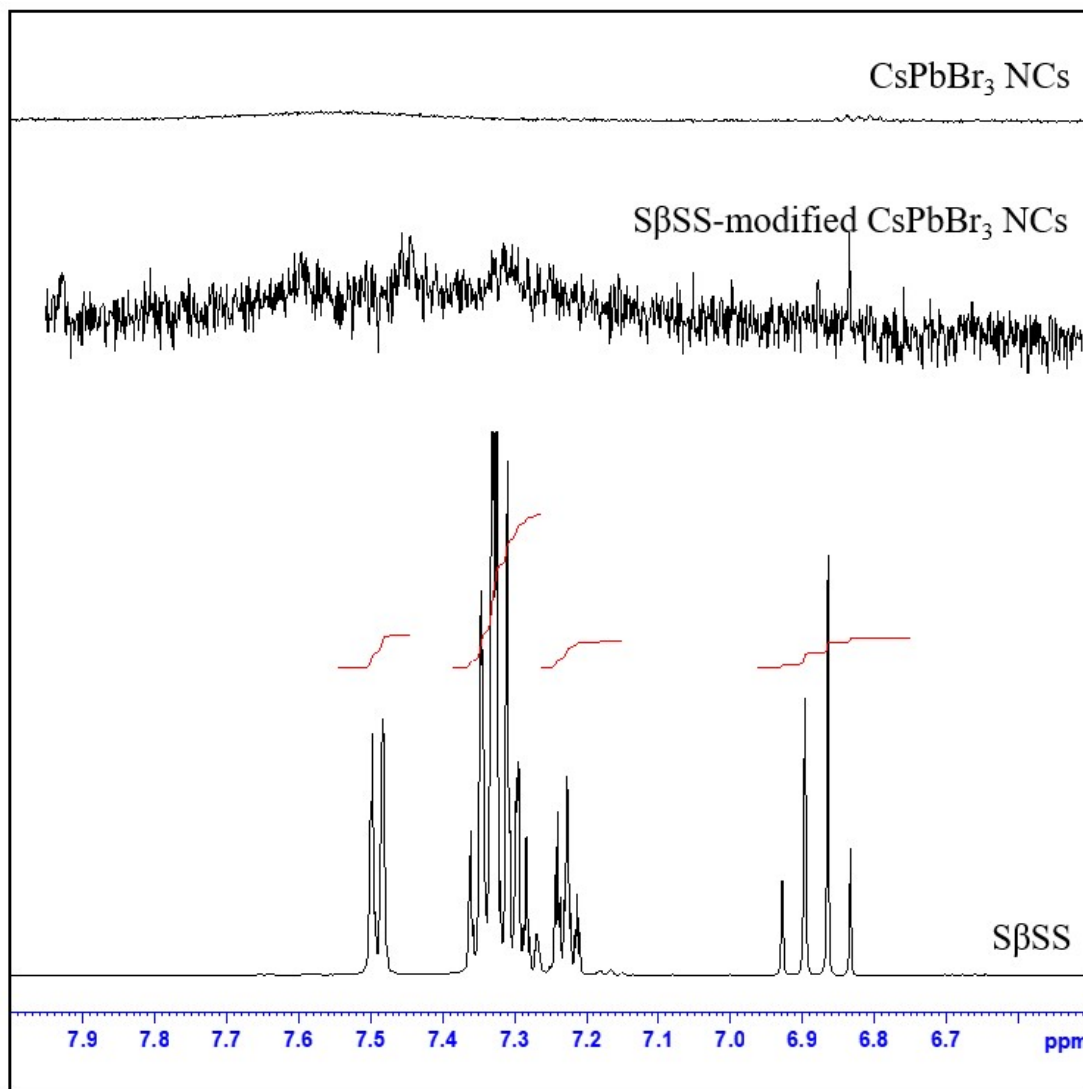

**Fig. S3.** NMR spectra corresponding to SβSS, the pristine and SβSS-modified CsPbBr<sub>3</sub> NCs (10 mg).

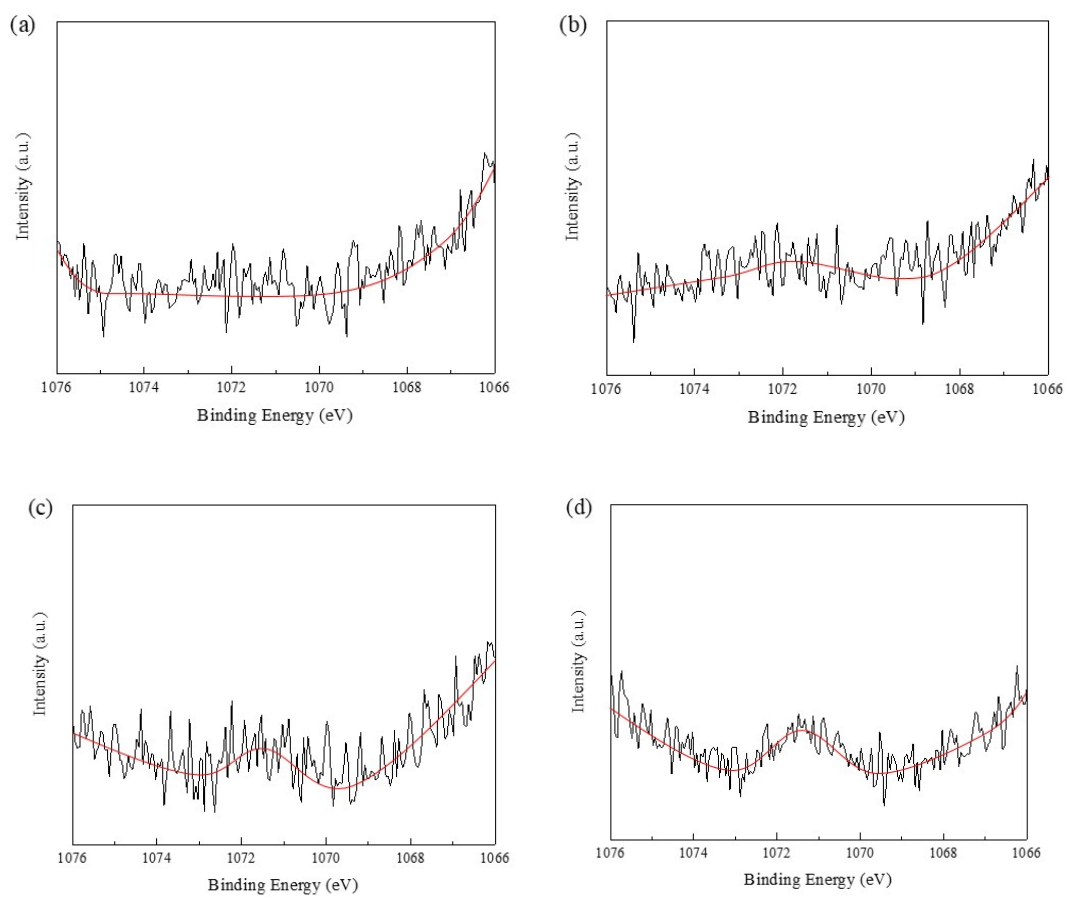

**Fig. S4.** XPS spectra of Na  $1s$  in the (a) pristine and S $\beta$ SS-modified CsPbBr<sub>3</sub> NCs with (b) 5, (c) 10, and (d) 20 mg of S $\beta$ SS.

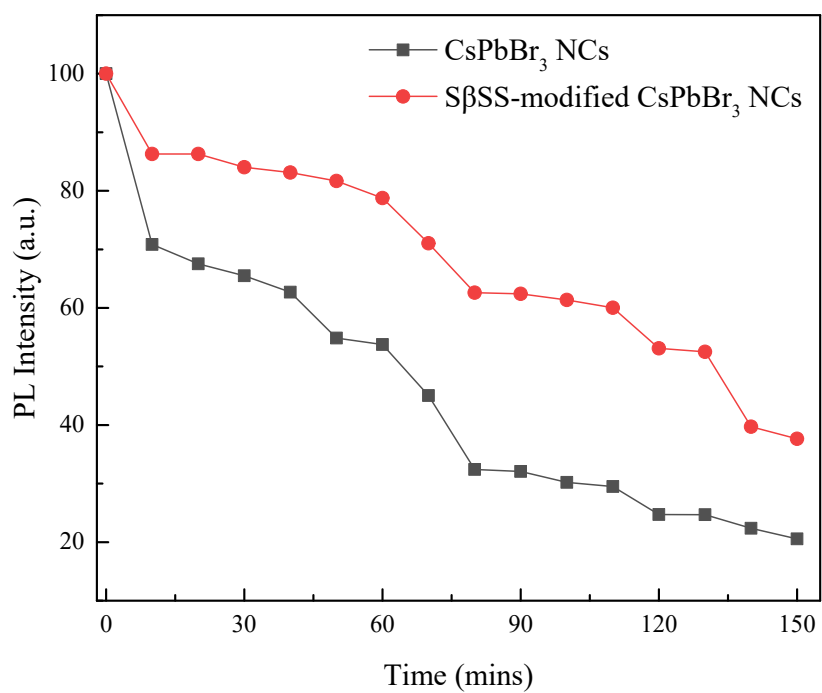

**Fig. S5.** Time-dependent PL intensity of the pristine and SβSS-modified CsPbBr<sub>3</sub> NCs (10 mg) at 100 °C for 150 min.

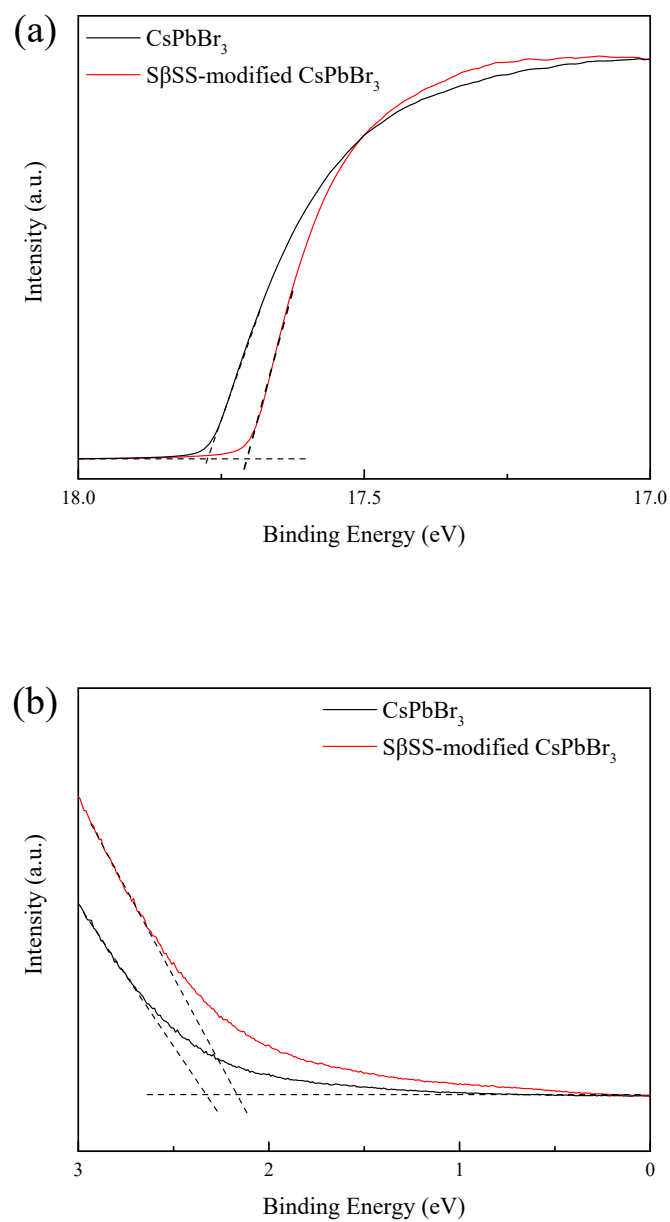

**Fig. S6.** UPS spectra of the pristine and SβSS-modified CsPbBr<sub>3</sub> NCs (10 mg) in the (a) cut-off and (b) valence band regions.

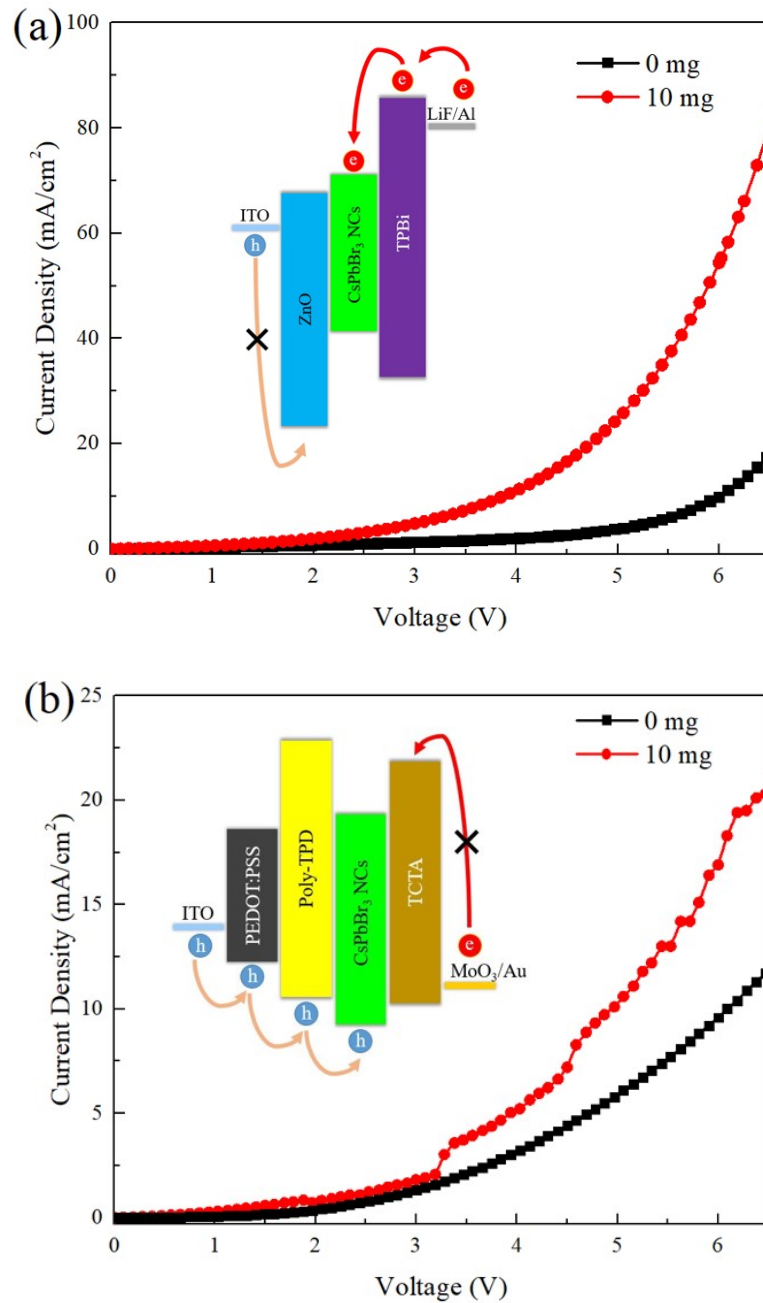

**Fig. S7.** Current density-voltage characteristics of (a) electron-only and (b) holey-only devices containing the pristine or  $\beta$ SS-modified CsPbBr<sub>3</sub> NCs (10 mg).

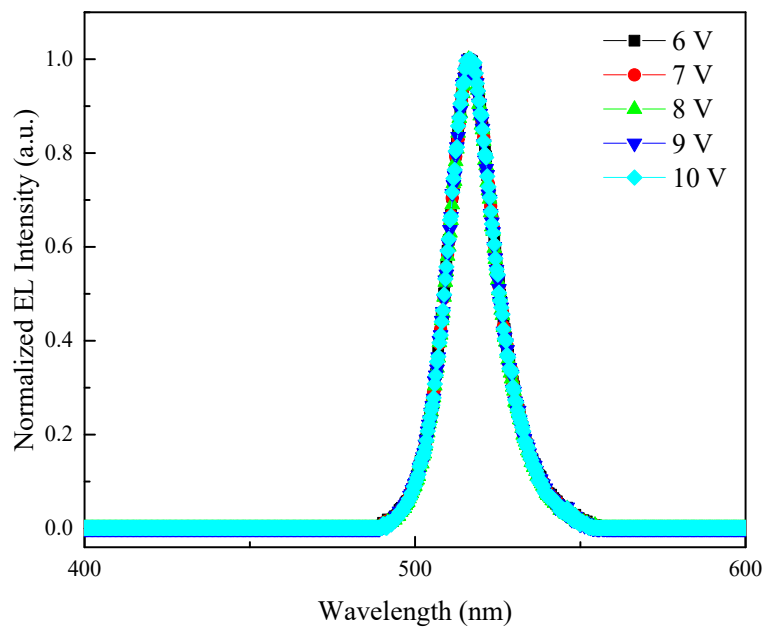

**Fig. S8.** EL spectra of the S $\beta$ SS-modified CsPbBr<sub>3</sub> NCs (10 mg) under different bias voltages of 6–10 V.
